# Supplementary material for: Single-cell RNA sequencing reveals novel gene expression signatures of trastuzumab treatment in HER2+ breast cancer: A pilot study
Source: PubMed Central journal article supplement — Medicine (Baltimore). 2019 Jun 28;98(26):e15872. doi: 10.1097/MD.0000000000015872 (PMC6617483; doi:10.1097/md.0000000000015872), 2019-06-28
Supplement: medi-98-e15872-s001.pdf [file medi-98-e15872-s001.pdf]

**Table S1. Significantly differential expressed genes between trastuzumab treated versus non-treated single cancer cells.** Genes with adjusted p-value <0.05 and fold-change >1.5 were considered as significantly differential expressed.

| GeneID   | Estimate | Fold Change | Raw p-value | Bonferroni Adjusted p-value |
|----------|----------|-------------|-------------|-----------------------------|
| IL8      | -5.2501  | -38.0563    | 3.2383E-16  | 1.7958E-11                  |
| HLA-DRA  | -4.8251  | -28.3473    | 3.1197E-17  | 1.73E-12                    |
| CD74     | -4.4628  | -22.051     | 2.5143E-21  | 1.3943E-16                  |
| TFF3     | -3.3728  | -10.3588    | 1.0686E-08  | 0.0006                      |
| HLA-B    | -3.3131  | -9.9389     | 6.8568E-25  | 3.8024E-20                  |
| B2M      | -3.1411  | -8.8219     | 2.5767E-20  | 1.4289E-15                  |
| LDHB     | -3.1302  | -8.7553     | 1.8061E-26  | 1.0016E-21                  |
| CXCL1    | -3.117   | -8.676      | 7.4085E-19  | 4.1083E-14                  |
| IFITM3   | -3.0724  | -8.412      | 1.6979E-20  | 9.4158E-16                  |
| RGS1     | -2.9804  | -7.892      | 5.7703E-18  | 3.1999E-13                  |
| HLA-A    | -2.8803  | -7.3629     | 7.616E-18   | 4.2234E-13                  |
| HSPA1B   | -2.8217  | -7.0697     | 3.9498E-10  | 0.000021903                 |
| IFITM1   | -2.793   | -6.9306     | 2.932E-17   | 1.6259E-12                  |
| CEACAM6  | -2.619   | -6.1433     | 2.1305E-13  | 1.1814E-08                  |
| SPP1     | -2.5945  | -6.0396     | 4.2484E-11  | 2.3559E-06                  |
| RGS2     | -2.5909  | -6.0247     | 2.9824E-15  | 1.6538E-10                  |
| CIB1     | -2.5212  | -5.7405     | 2.381E-10   | 0.000013204                 |
| ANXA1    | -2.4904  | -5.6195     | 4.3452E-18  | 2.4096E-13                  |
| NGRN     | -2.4845  | -5.5965     | 3.4096E-11  | 1.8908E-06                  |
| CXCL10   | -2.4364  | -5.4129     | 1.6102E-12  | 8.9291E-08                  |
| S100A6   | -2.3918  | -5.2482     | 6.1933E-14  | 3.4344E-09                  |
| H3F3B    | -2.3715  | -5.1746     | 1.5671E-20  | 8.6902E-16                  |
| BC016015 | -2.2992  | -4.9218     | 1.5038E-12  | 8.3393E-08                  |
| RPL19    | -2.2681  | -4.817      | 2.377E-19   | 1.3182E-14                  |
| HLA-DMA  | -2.2392  | -4.7213     | 1.0083E-15  | 5.5914E-11                  |
| S100A10  | -2.234   | -4.7043     | 2.8142E-18  | 1.5606E-13                  |
| MT1X     | -2.1922  | -4.5699     | 8.117E-14   | 4.5012E-09                  |
| CCL3     | -2.1733  | -4.5105     | 4.3039E-08  | 0.0024                      |
| FTL      | -2.1564  | -4.4579     | 8.1563E-15  | 4.523E-10                   |
| HLA-DPA1 | -2.1044  | -4.3002     | 2.7817E-11  | 1.5426E-06                  |
| HLA-DPB1 | -2.1044  | -4.3002     | 1.0535E-10  | 5.8419E-06                  |
| NFKBIA   | -2.0961  | -4.2754     | 9.4086E-12  | 5.2175E-07                  |
| CD74     | -2.0851  | -4.243      | 9.8685E-16  | 5.4725E-11                  |
| PSMB9    | -2.0718  | -4.2042     | 1.8441E-17  | 1.0226E-12                  |

|          |         |         |            |             |
|----------|---------|---------|------------|-------------|
| TMSB4X   | -2.0516 | -4.1457 | 1.1844E-15 | 6.5678E-11  |
| GSTP1    | -2.0406 | -4.1143 | 1.2471E-14 | 6.9159E-10  |
| CXCL17   | -1.9921 | -3.9781 | 1.0045E-18 | 5.5703E-14  |
| IFI27    | -1.9406 | -3.8385 | 4.5839E-17 | 2.542E-12   |
| NGS-17   | -1.9253 | -3.7981 | 4.9277E-12 | 2.7326E-07  |
| HSP90AA1 | -1.8706 | -3.6568 | 4.6772E-11 | 2.5937E-06  |
| UBD      | -1.814  | -3.5162 | 4.8378E-16 | 2.6828E-11  |
| CRIP1    | -1.7546 | -3.3744 | 1.3159E-09 | 0.000072973 |
| PSMB8    | -1.7176 | -3.2888 | 2.6609E-12 | 1.4756E-07  |
| SOX4     | -1.6693 | -3.1806 | 1.459E-08  | 0.0008      |
| CEACAM5  | -1.6675 | -3.1766 | 7.4871E-15 | 4.1519E-10  |
| KLF6     | -1.6624 | -3.1655 | 1.2913E-07 | 0.0072      |
| AK311497 | -1.6356 | -3.1072 | 2.0362E-14 | 1.1292E-09  |
| HLA-E    | -1.6223 | -3.0786 | 3.0721E-15 | 1.7036E-10  |
| HSPA5    | -1.6096 | -3.0517 | 1.39E-08   | 0.0008      |
| IFITM2   | -1.5769 | -2.9832 | 1.9852E-08 | 0.0011      |
| FAM46A   | -1.573  | -2.9753 | 2.1391E-14 | 1.1862E-09  |
| UBB      | -1.5723 | -2.9738 | 1.3365E-11 | 7.4113E-07  |
| DUSP6    | -1.565  | -2.9588 | 8.7432E-07 | 0.0485      |
| EREG     | -1.4941 | -2.8168 | 2.024E-18  | 1.1224E-13  |
| SOD2     | -1.4932 | -2.8151 | 1.4964E-08 | 0.0008      |
| S100P    | -1.4869 | -2.8028 | 9.7587E-13 | 5.4116E-08  |
| CIB1     | -1.473  | -2.7759 | 7.4403E-07 | 0.0413      |
| HLA-DRB1 | -1.4665 | -2.7635 | 1.4769E-13 | 8.1903E-09  |
| HSPA1B   | -1.4647 | -2.76   | 1.8393E-10 | 0.0000102   |
| NCOA7    | -1.4539 | -2.7395 | 6.0111E-12 | 3.3334E-07  |
| CLIC1    | -1.4472 | -2.7269 | 5.8757E-09 | 0.0003      |
| ILF2     | -1.4392 | -2.7117 | 1.2392E-07 | 0.0069      |
| PFN1     | -1.4177 | -2.6716 | 1.3047E-07 | 0.0072      |
| DAPP1    | -1.4047 | -2.6477 | 1.6615E-13 | 9.2138E-09  |
| BCL2A1   | -1.392  | -2.6244 | 3.0048E-07 | 0.0167      |
| HLA-A    | -1.3919 | -2.6242 | 6.6815E-16 | 3.7052E-11  |
| PNRC1    | -1.3702 | -2.585  | 5.2982E-11 | 2.9381E-06  |
| SRGN     | -1.3531 | -2.5547 | 6.1567E-09 | 0.0003      |
| UBC      | -1.3525 | -2.5535 | 2.0274E-08 | 0.0011      |
| HSPA6    | -1.3519 | -2.5525 | 8.1562E-08 | 0.0045      |
| SELK     | -1.3422 | -2.5353 | 7.8476E-09 | 0.0004      |
| HLA-DRB1 | -1.3348 | -2.5225 | 1.5011E-16 | 8.324E-12   |
| S100A4   | -1.3281 | -2.5108 | 8.8284E-10 | 0.000048957 |
| ATF4     | -1.3153 | -2.4885 | 8.6281E-07 | 0.0478      |
| RND3     | -1.2957 | -2.455  | 1.013E-15  | 5.6178E-11  |
| CPE      | -1.2913 | -2.4475 | 5.0718E-18 | 2.8125E-13  |
| PLAUR    | -1.2776 | -2.4244 | 8.1009E-08 | 0.0045      |

|                 |         |         |            |             |
|-----------------|---------|---------|------------|-------------|
| GAPDH           | -1.2719 | -2.4148 | 1.3927E-08 | 0.0008      |
| GBP1            | -1.2568 | -2.3897 | 9.0325E-17 | 5.0089E-12  |
| BPIFB2          | -1.2339 | -2.352  | 2.0655E-10 | 0.000011454 |
| CD69            | -1.2336 | -2.3515 | 6.0207E-08 | 0.0033      |
| PTMA            | -1.2078 | -2.3099 | 4.1997E-16 | 2.3289E-11  |
| KRT81           | -1.2026 | -2.3015 | 9.9233E-12 | 5.5029E-07  |
| LGALS3BP        | -1.2024 | -2.3013 | 2.4701E-07 | 0.0137      |
| MUC19           | -1.1901 | -2.2817 | 2.6004E-09 | 0.0001      |
| PKIB            | -1.179  | -2.2642 | 3.791E-10  | 0.000021022 |
| RPS29           | -1.1687 | -2.248  | 9.0385E-13 | 5.0122E-08  |
| TNFAIP2         | -1.1544 | -2.2259 | 4.4794E-08 | 0.0025      |
| C8orf4          | -1.1381 | -2.2009 | 1.7029E-13 | 9.4433E-09  |
| DDIT3           | -1.1312 | -2.1904 | 3.4538E-07 | 0.0192      |
| TAPBP           | -1.1205 | -2.1742 | 7.8408E-08 | 0.0043      |
| TNFAIP8         | -1.1182 | -2.1707 | 1.3223E-07 | 0.0073      |
| GLRX            | -1.1025 | -2.1473 | 8.323E-12  | 4.6154E-07  |
| ENSG00000210082 | -1.1018 | -2.1463 | 5.2537E-07 | 0.0291      |
| PSME1           | -1.0974 | -2.1397 | 8.1745E-07 | 0.0453      |
| CCDC170         | -1.0965 | -2.1384 | 1.0836E-07 | 0.006       |
| ATP5E           | -1.0763 | -2.1086 | 2.4483E-15 | 1.3577E-10  |
| LCP1            | -1.0679 | -2.0964 | 1.2901E-08 | 0.0007      |
| LGALS3BP        | -1.0655 | -2.093  | 2.4265E-08 | 0.0013      |
| KRT20           | -1.0616 | -2.0872 | 2.1261E-11 | 0.000001179 |
| PPP3CA          | -1.0605 | -2.0857 | 4.7482E-08 | 0.0026      |
| VIM             | -1.0131 | -2.0183 | 4.9594E-10 | 0.000027502 |
| PSMB8           | -1.0083 | -2.0116 | 5.824E-09  | 0.0003      |
| WBP5            | -1.0043 | -2.006  | 4.9912E-16 | 2.7678E-11  |
| IST1            | -1.0005 | -2.0006 | 4.5515E-07 | 0.0252      |
| BRD2            | -0.9956 | -1.9939 | 1.1475E-08 | 0.0006      |
| HLA-DQB1        | -0.9632 | -1.9497 | 3.717E-15  | 2.0612E-10  |
| HSPE1           | -0.9483 | -1.9296 | 2.4727E-07 | 0.0137      |
| IL2RG           | -0.9453 | -1.9256 | 5.2284E-08 | 0.0029      |
| UBE2J1          | -0.942  | -1.9211 | 2.8517E-07 | 0.0158      |
| RPS27           | -0.9392 | -1.9175 | 8.9231E-10 | 0.000049482 |
| AREG            | -0.9378 | -1.9156 | 2.7621E-14 | 1.5317E-09  |
| HLA-DQB1        | -0.9277 | -1.9022 | 2.8175E-07 | 0.0156      |
| WFDC2           | -0.9179 | -1.8894 | 5.818E-09  | 0.0003      |
| BTG2            | -0.9111 | -1.8805 | 3.0879E-07 | 0.0171      |
| SOD2            | -0.9104 | -1.8796 | 1.0985E-07 | 0.0061      |
| MIA3            | -0.8747 | -1.8337 | 2.0772E-09 | 0.0001      |
| KLF5            | -0.8675 | -1.8245 | 5.2581E-14 | 2.9158E-09  |
| WBP5            | -0.854  | -1.8075 | 2.1318E-13 | 1.1822E-08  |
| HLA-DMB         | -0.8493 | -1.8016 | 5.7132E-07 | 0.0317      |

|          |         |         |            |             |
|----------|---------|---------|------------|-------------|
| GMFG     | -0.8118 | -1.7554 | 1.3223E-07 | 0.0073      |
| RDH10    | -0.8074 | -1.75   | 8.0087E-07 | 0.0444      |
| TAP1     | -0.8037 | -1.7456 | 5.3608E-16 | 2.9728E-11  |
| GSTA1    | -0.788  | -1.7267 | 1.1203E-12 | 6.2123E-08  |
| CALML5   | -0.7737 | -1.7097 | 6.3428E-17 | 3.5173E-12  |
| B3GNT7   | -0.7724 | -1.7081 | 3.8038E-07 | 0.0211      |
| ELF1     | -0.7696 | -1.7048 | 8.6686E-07 | 0.0481      |
| PALLD    | -0.7687 | -1.7038 | 1.3301E-15 | 7.3758E-11  |
| SNHG5    | -0.7673 | -1.702  | 6.5058E-08 | 0.0036      |
| BIRC3    | -0.7628 | -1.6968 | 3.5607E-10 | 0.000019745 |
| UBB      | -0.741  | -1.6713 | 6.1272E-09 | 0.0003      |
| E02193   | -0.7394 | -1.6694 | 2.3858E-07 | 0.0132      |
| CDK12    | -0.7334 | -1.6625 | 4.868E-10  | 0.000026995 |
| SCPEP1   | -0.7287 | -1.6572 | 3.4836E-07 | 0.0193      |
| KLF4     | -0.7286 | -1.657  | 5.2076E-12 | 2.8878E-07  |
| DNAJB11  | -0.7211 | -1.6484 | 8.7868E-07 | 0.0487      |
| SH3BGRL2 | -0.7191 | -1.6462 | 1.0525E-12 | 5.8367E-08  |
| CIB1     | -0.7148 | -1.6413 | 2.3126E-08 | 0.0013      |
| CD83     | -0.7106 | -1.6365 | 1.151E-11  | 6.3826E-07  |
| PSMB10   | -0.7106 | -1.6365 | 6.0046E-10 | 0.000033298 |
| LAPTM5   | -0.6999 | -1.6244 | 2.8156E-15 | 1.5613E-10  |
| TDP2     | -0.6845 | -1.6071 | 8.1646E-08 | 0.0045      |
| HLA-DMA  | -0.6828 | -1.6052 | 2.6004E-09 | 0.0001      |
| NEDD9    | -0.682  | -1.6043 | 6.3033E-12 | 3.4955E-07  |
| NDST4    | -0.6762 | -1.5979 | 1.7582E-13 | 9.7501E-09  |
| STRN3    | -0.6713 | -1.5925 | 2.3948E-08 | 0.0013      |
| CCL20    | -0.662  | -1.5823 | 1.2901E-08 | 0.0007      |
| CXCL2    | -0.6582 | -1.5781 | 2.3805E-12 | 1.3201E-07  |
| HLA-B    | -0.6562 | -1.5759 | 1.7745E-09 | 0.000098401 |
| HSD17B11 | -0.6395 | -1.5577 | 4.0879E-07 | 0.0227      |
| F3       | -0.6327 | -1.5505 | 2.214E-10  | 0.000012278 |
| NDST4    | -0.6309 | -1.5486 | 3.933E-11  | 0.000002181 |
| FAT1     | -0.6134 | -1.5299 | 1.8891E-09 | 0.0001      |
| EMP1     | -0.6113 | -1.5277 | 4.6911E-14 | 2.6014E-09  |
| RPS21    | -0.6079 | -1.524  | 8.8911E-07 | 0.0493      |
| CDC42EP3 | -0.5942 | -1.5096 | 8.8761E-13 | 4.9221E-08  |
| IFI16    | -0.5905 | -1.5057 | 4.8413E-07 | 0.0268      |
| HNRNPC   | -0.5884 | -1.5036 | 4.3093E-08 | 0.0024      |
| ARID5B   | 0.5887  | 1.5038  | 3.1122E-07 | 0.0173      |
| FAM45B_2 | 0.5889  | 1.5041  | 2.309E-07  | 0.0128      |
| PROM1    | 0.5894  | 1.5046  | 5.7686E-08 | 0.0032      |
| ALKBH3   | 0.5913  | 1.5066  | 3.3586E-09 | 0.0002      |
| BZW2     | 0.592   | 1.5074  | 8.0632E-07 | 0.0447      |

|          |        |        |            |             |
|----------|--------|--------|------------|-------------|
| ARHGEF10 | 0.5933 | 1.5087 | 3.8597E-07 | 0.0214      |
| VAMP8    | 0.5937 | 1.5092 | 2.2658E-09 | 0.0001      |
| LIMA1    | 0.5947 | 1.5102 | 6.502E-11  | 3.6056E-06  |
| SLC30A8  | 0.595  | 1.5105 | 5.4343E-09 | 0.0003      |
| IARS2    | 0.5953 | 1.5108 | 6.7908E-10 | 0.000037658 |
| TBC1D3   | 0.5966 | 1.5122 | 6.2428E-17 | 3.4619E-12  |
| ACAT1    | 0.5971 | 1.5127 | 1.4127E-07 | 0.0078      |
| ARID2    | 0.5986 | 1.5142 | 2.8246E-08 | 0.0016      |
| CTSH     | 0.6002 | 1.516  | 1.9195E-10 | 0.000010644 |
| DPCD     | 0.6002 | 1.516  | 2.7563E-07 | 0.0153      |
| TRPA1    | 0.6015 | 1.5173 | 4.4047E-09 | 0.0002      |
| NOP10    | 0.6027 | 1.5185 | 3.9332E-09 | 0.0002      |
| C11orf1  | 0.6084 | 1.5246 | 2.0207E-09 | 0.0001      |
| CAMK2D   | 0.6105 | 1.5268 | 2.8359E-07 | 0.0157      |
| ALG14    | 0.6107 | 1.527  | 8.7318E-08 | 0.0048      |
| CALR     | 0.6139 | 1.5304 | 5.5316E-12 | 3.0675E-07  |
| PSMA1    | 0.619  | 1.5358 | 1.2739E-07 | 0.0071      |
| RPA2     | 0.6202 | 1.5371 | 2.9081E-08 | 0.0016      |
| NDUFB6   | 0.6205 | 1.5374 | 1.1402E-08 | 0.0006      |
| ELF5     | 0.6208 | 1.5377 | 6.3635E-08 | 0.0035      |
| REEP5    | 0.6242 | 1.5414 | 2.1317E-07 | 0.0118      |
| LIMCH1   | 0.6257 | 1.5429 | 4.7798E-15 | 2.6506E-10  |
| RPS11    | 0.6263 | 1.5436 | 5.5308E-08 | 0.0031      |
| MRPL20   | 0.6299 | 1.5475 | 8.6827E-08 | 0.0048      |
| C21orf59 | 0.6309 | 1.5486 | 2.3696E-10 | 0.00001314  |
| SEP15    | 0.6311 | 1.5487 | 1.9304E-07 | 0.0107      |
| MDM2     | 0.6339 | 1.5517 | 6.1483E-10 | 0.000034095 |
| RAB6A    | 0.6348 | 1.5527 | 1.8625E-07 | 0.0103      |
| WWP1     | 0.638  | 1.5562 | 4.5316E-10 | 0.00002513  |
| RNF135   | 0.6405 | 1.5589 | 6.4473E-12 | 3.5753E-07  |
| TAT      | 0.6407 | 1.5591 | 1.2737E-09 | 0.00007063  |
| ANKRD30A | 0.6416 | 1.5601 | 4.6774E-24 | 2.5938E-19  |
| TIMM10   | 0.6442 | 1.5629 | 8.9623E-07 | 0.0497      |
| CHMP5    | 0.6447 | 1.5634 | 5.7642E-07 | 0.032       |
| PNMT     | 0.6449 | 1.5637 | 5.7229E-14 | 3.1736E-09  |
| TWF1     | 0.6526 | 1.572  | 1.4001E-08 | 0.0008      |
| TMEM159  | 0.6541 | 1.5737 | 9.4138E-08 | 0.0052      |
| AK097794 | 0.6552 | 1.5748 | 7.5035E-18 | 4.161E-13   |
| PPP6R3   | 0.6563 | 1.576  | 3.9161E-08 | 0.0022      |
| PLK2     | 0.6563 | 1.5761 | 1.657E-07  | 0.0092      |
| MPHOSPH6 | 0.6585 | 1.5785 | 6.9462E-07 | 0.0385      |
| TMEM14A  | 0.6622 | 1.5824 | 2.3701E-08 | 0.0013      |
| TIMM8B   | 0.663  | 1.5833 | 2.4421E-13 | 1.3543E-08  |

|           |        |        |            |             |
|-----------|--------|--------|------------|-------------|
| MDM4      | 0.6629 | 1.5833 | 2.0633E-09 | 0.0001      |
| GSDMB     | 0.6634 | 1.5838 | 4.0697E-12 | 2.2568E-07  |
| USMG5     | 0.6649 | 1.5855 | 1.2062E-08 | 0.0007      |
| NDUFB3    | 0.6664 | 1.5871 | 2.983E-07  | 0.0165      |
| TOB1      | 0.6672 | 1.588  | 1.6477E-07 | 0.0091      |
| NHSL1     | 0.6675 | 1.5883 | 4.1481E-12 | 2.3003E-07  |
| UBE2V2    | 0.6691 | 1.5901 | 2.5395E-07 | 0.0141      |
| ADIRF     | 0.6713 | 1.5925 | 2.0468E-08 | 0.0011      |
| BRD3      | 0.6725 | 1.5938 | 1.6488E-12 | 9.1433E-08  |
| DCD       | 0.6787 | 1.6007 | 3.0543E-07 | 0.0169      |
| NDUFAB1   | 0.6796 | 1.6017 | 1.9362E-08 | 0.0011      |
| COX8A     | 0.6807 | 1.6029 | 3.5807E-10 | 0.000019857 |
| RPL41     | 0.6815 | 1.6038 | 1.1938E-11 | 6.6201E-07  |
| EIF5A     | 0.6839 | 1.6064 | 2.4418E-15 | 1.3541E-10  |
| MRPL50    | 0.6842 | 1.6068 | 1.8666E-07 | 0.0104      |
| PNKD      | 0.6856 | 1.6084 | 4.3363E-09 | 0.0002      |
| NDUFA4    | 0.686  | 1.6089 | 5.5272E-08 | 0.0031      |
| LETM1     | 0.6894 | 1.6126 | 4.8703E-17 | 2.7008E-12  |
| NFIA      | 0.691  | 1.6144 | 6.6148E-12 | 3.6682E-07  |
| CAPZB     | 0.6928 | 1.6164 | 9.7202E-09 | 0.0005      |
| APLP2     | 0.6933 | 1.617  | 4.1752E-09 | 0.0002      |
| TLK1      | 0.6943 | 1.6182 | 1.7011E-07 | 0.0094      |
| PNMT      | 0.6946 | 1.6184 | 1.6988E-14 | 9.4205E-10  |
| SLC50A1   | 0.6976 | 1.6218 | 5.8483E-08 | 0.0032      |
| LOC440434 | 0.6983 | 1.6226 | 7.3031E-13 | 4.0498E-08  |
| PPCS      | 0.7025 | 1.6273 | 1.085E-08  | 0.0006      |
| CASP6     | 0.7031 | 1.628  | 1.7026E-10 | 9.4415E-06  |
| PAR6B     | 0.7062 | 1.6315 | 1.216E-07  | 0.0067      |
| BSG       | 0.7069 | 1.6323 | 1.3175E-09 | 0.00007306  |
| ZAK       | 0.7077 | 1.6332 | 9.8081E-13 | 5.439E-08   |
| TOMM5     | 0.7083 | 1.6338 | 8.4114E-08 | 0.0047      |
| RPL8      | 0.7084 | 1.634  | 2.8377E-11 | 1.5736E-06  |
| TM2D3     | 0.7096 | 1.6354 | 6.1329E-07 | 0.034       |
| LRRC16A   | 0.7117 | 1.6377 | 4.2773E-11 | 2.3719E-06  |
| GATA3     | 0.7151 | 1.6416 | 1.1073E-10 | 6.1406E-06  |
| RPS25     | 0.716  | 1.6427 | 6.1328E-13 | 3.4009E-08  |
| ATP5J     | 0.721  | 1.6483 | 6.9482E-10 | 0.00003853  |
| PSMB7     | 0.7244 | 1.6522 | 3.5449E-07 | 0.0197      |
| MLLT3     | 0.7302 | 1.6589 | 7.7223E-14 | 4.2823E-09  |
| CDC123    | 0.7335 | 1.6626 | 5.3003E-08 | 0.0029      |
| PALMD     | 0.7347 | 1.6641 | 1.546E-16  | 8.573E-12   |
| GSDMB     | 0.7358 | 1.6654 | 5.8086E-11 | 3.2211E-06  |
| TSTA3     | 0.7371 | 1.6668 | 7.0102E-11 | 3.8874E-06  |

|         |        |        |            |             |
|---------|--------|--------|------------|-------------|
| VPS28   | 0.7374 | 1.6672 | 7.5694E-08 | 0.0042      |
| SLC5A8  | 0.7395 | 1.6695 | 6.4888E-15 | 3.5983E-10  |
| HERC2P7 | 0.7468 | 1.6781 | 3.3951E-09 | 0.0002      |
| VTA1    | 0.7505 | 1.6824 | 6.0679E-07 | 0.0336      |
| TRIM5   | 0.7537 | 1.6861 | 9.228E-10  | 0.000051173 |
| PON3    | 0.7569 | 1.6898 | 5.6881E-09 | 0.0003      |
| PPP1CB  | 0.758  | 1.6911 | 9.6364E-10 | 0.000053438 |
| CO9     | 0.7583 | 1.6914 | 1.3337E-09 | 0.000073959 |
| CWC25   | 0.7584 | 1.6916 | 3.3656E-21 | 1.8664E-16  |
| EAF1    | 0.7704 | 1.7058 | 5.4903E-10 | 0.000030446 |
| RPL23   | 0.7713 | 1.7068 | 1.0877E-22 | 6.032E-18   |
| SLC39A4 | 0.7728 | 1.7086 | 4.1845E-14 | 2.3205E-09  |
| MSL1    | 0.7777 | 1.7143 | 3.243E-07  | 0.018       |
| SRSF11  | 0.7795 | 1.7165 | 4.6072E-11 | 2.5549E-06  |
| TMEM209 | 0.7797 | 1.7168 | 5.1062E-08 | 0.0028      |
| GPX4    | 0.7808 | 1.7181 | 1.6148E-10 | 8.9547E-06  |
| SNRPD2  | 0.7858 | 1.724  | 9.3912E-10 | 0.000052078 |
| RTN3    | 0.788  | 1.7266 | 1.6154E-08 | 0.0009      |
| ATP5F1  | 0.7908 | 1.73   | 2.3363E-07 | 0.013       |
| RPL7A   | 0.7924 | 1.7319 | 2.5556E-10 | 0.000014172 |
| ATPIF1  | 0.7981 | 1.7388 | 5.827E-11  | 3.2313E-06  |
| ECHS1   | 0.8011 | 1.7425 | 4.6782E-09 | 0.0003      |
| EIF1AD  | 0.8035 | 1.7453 | 7.8088E-08 | 0.0043      |
| MSL1    | 0.8041 | 1.746  | 3.288E-16  | 1.8233E-11  |
| UBE4A   | 0.8062 | 1.7487 | 1.1642E-08 | 0.0006      |
| TMEM87A | 0.807  | 1.7495 | 3.0158E-12 | 1.6724E-07  |
| KMO     | 0.807  | 1.7496 | 1.348E-08  | 0.0007      |
| UBA6    | 0.8095 | 1.7527 | 1.7837E-14 | 9.8912E-10  |
| UCP2    | 0.8131 | 1.757  | 8.9696E-14 | 4.974E-09   |
| PADI2   | 0.8145 | 1.7587 | 1.1797E-11 | 6.5418E-07  |
| SMIM7   | 0.815  | 1.7593 | 3.4134E-12 | 1.8929E-07  |
| CA12    | 0.8195 | 1.7647 | 5.1187E-20 | 2.8385E-15  |
| TMEM141 | 0.82   | 1.7654 | 8.4495E-16 | 4.6856E-11  |
| COX6A1  | 0.8209 | 1.7665 | 2.6177E-11 | 1.4516E-06  |
| FRMD8   | 0.828  | 1.7752 | 4.29E-19   | 2.379E-14   |
| PRDX3   | 0.8288 | 1.7762 | 5.0809E-09 | 0.0003      |
| NFIB    | 0.8289 | 1.7763 | 2.1704E-10 | 0.000012035 |
| BLOC1S3 | 0.8293 | 1.7769 | 1.6314E-07 | 0.009       |
| SLC48A1 | 0.8358 | 1.7849 | 5.944E-09  | 0.0003      |
| MRPS9   | 0.8359 | 1.7849 | 8.8095E-08 | 0.0049      |
| ZBTB44  | 0.8426 | 1.7932 | 1.3471E-16 | 7.4701E-12  |
| PIGR    | 0.8472 | 1.799  | 1.215E-07  | 0.0067      |
| TMEM41B | 0.8478 | 1.7997 | 1.3422E-09 | 0.00007443  |

|               |        |        |            |             |
|---------------|--------|--------|------------|-------------|
| NEAT1         | 0.8527 | 1.8059 | 1.3852E-10 | 7.6815E-06  |
| HENMT1        | 0.8532 | 1.8065 | 3.19E-13   | 1.769E-08   |
| PAFAH1B3      | 0.8583 | 1.8129 | 3.709E-11  | 2.0568E-06  |
| H3F3A         | 0.8602 | 1.8153 | 3.4867E-12 | 1.9335E-07  |
| FAM171B       | 0.8627 | 1.8184 | 6.4674E-10 | 0.000035864 |
| TRMT112       | 0.8627 | 1.8184 | 1.4002E-09 | 0.000077645 |
| RASSF3        | 0.8703 | 1.8281 | 3.2939E-18 | 1.8266E-13  |
| ZAK           | 0.8723 | 1.8306 | 1.4105E-19 | 7.8216E-15  |
| ETF A         | 0.8738 | 1.8325 | 1.1507E-09 | 0.00006381  |
| NDUFC2        | 0.8777 | 1.8375 | 1.2376E-10 | 6.8628E-06  |
| ANKRD10       | 0.8789 | 1.8389 | 3.2816E-08 | 0.0018      |
| UQCRH         | 0.8818 | 1.8427 | 5.3562E-11 | 2.9703E-06  |
| WDR83OS       | 0.8922 | 1.856  | 1.8249E-09 | 0.0001      |
| MINOS1        | 0.8935 | 1.8577 | 5.099E-13  | 2.8276E-08  |
| RPL9_3        | 0.8947 | 1.8593 | 4.2103E-10 | 0.000023348 |
| NUP43         | 0.9011 | 1.8675 | 4.3088E-13 | 2.3894E-08  |
| GLTP          | 0.9032 | 1.8702 | 7.4952E-10 | 0.000041564 |
| IBA57         | 0.9036 | 1.8707 | 4.6677E-20 | 2.5884E-15  |
| TRA2A         | 0.908  | 1.8765 | 4.5365E-14 | 2.5157E-09  |
| ARGLU1        | 0.916  | 1.8869 | 5.36E-11   | 2.9723E-06  |
| TFAP2C        | 0.9229 | 1.8959 | 8.4797E-11 | 4.7024E-06  |
| MRPL14        | 0.9254 | 1.8993 | 9.1951E-12 | 5.099E-07   |
| SRP9          | 0.9279 | 1.9025 | 7.7565E-10 | 0.000043013 |
| RPL12         | 0.9284 | 1.9031 | 4.5498E-11 | 0.000002523 |
| ITGB6         | 0.9302 | 1.9056 | 8.0514E-18 | 4.4648E-13  |
| SMIM14        | 0.9335 | 1.9099 | 7.5469E-12 | 4.1851E-07  |
| ARHGAP1       | 0.9359 | 1.9131 | 2.7138E-14 | 1.5049E-09  |
| DYNLL1        | 0.9366 | 1.914  | 2.7598E-10 | 0.000015304 |
| STC1          | 0.9375 | 1.9152 | 7.437E-18  | 4.1241E-13  |
| CD46          | 0.9399 | 1.9184 | 1.5192E-07 | 0.0084      |
| TSC22D1       | 0.941  | 1.9199 | 1.4942E-10 | 8.2857E-06  |
| PEBP1         | 0.9425 | 1.9219 | 2.3835E-14 | 1.3217E-09  |
| ANKRD10       | 0.9439 | 1.9237 | 2.8615E-10 | 0.000015868 |
| RQCD1         | 0.9449 | 1.9251 | 1.101E-08  | 0.0006      |
| TOMM7         | 0.9485 | 1.9299 | 1.9218E-10 | 0.000010657 |
| CAP1          | 0.9488 | 1.9302 | 2.1565E-07 | 0.012       |
| TFAP2B        | 0.9513 | 1.9337 | 1.0504E-26 | 5.8251E-22  |
| DKFZp586B1922 | 0.956  | 1.94   | 4.4714E-11 | 2.4796E-06  |
| SAR1A         | 0.9603 | 1.9457 | 7.3536E-08 | 0.0041      |
| TC2N          | 0.9682 | 1.9564 | 5.8399E-17 | 3.2385E-12  |
| SNRPN         | 0.9697 | 1.9584 | 8.8733E-11 | 4.9206E-06  |
| ATP6V1G1      | 0.9743 | 1.9647 | 1.1113E-12 | 6.1625E-08  |
| TBC1D24       | 0.9891 | 1.9849 | 9.1436E-16 | 5.0705E-11  |



|          |        |        |            |             |
|----------|--------|--------|------------|-------------|
| ATP6V0B  | 0.9891 | 1.9849 | 1.833E-10  | 0.000010165 |
| SDC1     | 0.9937 | 1.9913 | 2.581E-10  | 0.000014313 |
| AB488780 | 0.9974 | 1.9965 | 5.3878E-10 | 0.000029877 |
| AIG1     | 0.9976 | 1.9967 | 8.3883E-11 | 4.6517E-06  |
| ALDOA    | 0.9997 | 1.9995 | 3.7998E-07 | 0.0211      |
| WSB2     | 1.014  | 2.0195 | 7.0378E-17 | 3.9027E-12  |
| PCMT1    | 1.0147 | 2.0205 | 1.3215E-11 | 7.3281E-07  |
| FAM111A  | 1.0217 | 2.0304 | 4.4971E-09 | 0.0002      |
| FAM3B    | 1.0283 | 2.0396 | 2.139E-17  | 1.1862E-12  |
| PIP4K2B  | 1.0345 | 2.0484 | 4.6602E-24 | 2.5843E-19  |
| SFXN1    | 1.0537 | 2.0759 | 7.7464E-16 | 4.2957E-11  |
| PRDX2    | 1.054  | 2.0763 | 9.2686E-13 | 5.1398E-08  |
| SLC25A3  | 1.0551 | 2.0778 | 7.3009E-09 | 0.0004      |
| NRIP3    | 1.0627 | 2.0888 | 9.2359E-19 | 5.1217E-14  |
| GRB14    | 1.0663 | 2.0941 | 2.2022E-15 | 1.2212E-10  |
| RAP2C    | 1.0797 | 2.1135 | 9.8994E-09 | 0.0005      |
| TMEM33   | 1.0853 | 2.1219 | 4.0308E-08 | 0.0022      |
| B4GALT1  | 1.0885 | 2.1265 | 3.0796E-15 | 1.7078E-10  |
| RBM4     | 1.0937 | 2.1342 | 1.8779E-11 | 1.0414E-06  |
| R3HDM2   | 1.1055 | 2.1517 | 1.2791E-18 | 7.0929E-14  |
| FKBP9    | 1.1088 | 2.1566 | 9.4842E-16 | 5.2594E-11  |
| SH3BGR1  | 1.1155 | 2.1667 | 3.1088E-08 | 0.0017      |
| RBM6     | 1.1323 | 2.1921 | 2.2871E-13 | 1.2683E-08  |
| PCMT1    | 1.1343 | 2.1952 | 2.7501E-11 | 0.000001525 |
| ORMDL3   | 1.1352 | 2.1966 | 5.8225E-14 | 3.2288E-09  |
| CASP2    | 1.1371 | 2.1993 | 6.979E-11  | 3.8701E-06  |
| GTF2A2   | 1.1383 | 2.2012 | 1.999E-11  | 1.1085E-06  |
| SCOC     | 1.14   | 2.2038 | 3.0883E-07 | 0.0171      |
| MLLT6    | 1.1548 | 2.2265 | 4.3931E-23 | 2.4362E-18  |
| LRRC1    | 1.1589 | 2.2329 | 9.6906E-16 | 5.3738E-11  |
| CRABP2   | 1.1777 | 2.2622 | 2.723E-14  | 1.51E-09    |
| ERBB2    | 1.1869 | 2.2766 | 1.1967E-14 | 6.636E-10   |
| CYB5A    | 1.19   | 2.2815 | 3.1841E-11 | 1.7657E-06  |
| PHACTR2  | 1.2091 | 2.3119 | 1.8106E-17 | 1.004E-12   |
| THAP5    | 1.214  | 2.3198 | 1.0671E-14 | 5.9177E-10  |
| ABRA1    | 1.2165 | 2.3239 | 2.978E-16  | 1.6514E-11  |
| SEC22B   | 1.2389 | 2.3602 | 1.0355E-17 | 5.7422E-13  |
| REEP3    | 1.2407 | 2.3631 | 1.9744E-16 | 1.0949E-11  |
| VSIG10   | 1.2508 | 2.3797 | 1.4758E-14 | 8.1839E-10  |
| SCGB1D2  | 1.2509 | 2.3799 | 6.229E-11  | 3.4542E-06  |
| AP3S1    | 1.2565 | 2.3891 | 3.9951E-14 | 2.2155E-09  |
| CASC3    | 1.2651 | 2.4034 | 6.7411E-14 | 3.7382E-09  |
| ZNF823   | 1.2701 | 2.4119 | 3.8267E-07 | 0.0212      |

|          |        |        |            |             |
|----------|--------|--------|------------|-------------|
| CDK2AP1  | 1.2783 | 2.4255 | 4.981E-17  | 2.7622E-12  |
| UOCR11   | 1.2792 | 2.427  | 5.0346E-17 | 2.7919E-12  |
| PCMTD1   | 1.2898 | 2.445  | 5.8258E-17 | 3.2306E-12  |
| GGCT     | 1.2925 | 2.4495 | 1.2279E-12 | 6.8092E-08  |
| SERHL2   | 1.2935 | 2.4512 | 8.392E-11  | 4.6537E-06  |
| DDAH1    | 1.2952 | 2.4541 | 9.1858E-13 | 5.0939E-08  |
| PTPLAD1  | 1.2998 | 2.4619 | 1.3367E-18 | 7.4124E-14  |
| TECR     | 1.3143 | 2.4868 | 5.1899E-15 | 2.878E-10   |
| ENPP1    | 1.3261 | 2.5072 | 3.9513E-18 | 2.1912E-13  |
| GATA3    | 1.3267 | 2.5083 | 2.1119E-24 | 1.1712E-19  |
| TRPS1    | 1.3433 | 2.5373 | 4.5605E-17 | 2.529E-12   |
| CSTA     | 1.3654 | 2.5764 | 6.9106E-22 | 3.8322E-17  |
| CYP4Z1   | 1.3766 | 2.5966 | 3.7302E-19 | 2.0686E-14  |
| CACUL1   | 1.3856 | 2.6128 | 5.4642E-16 | 3.0301E-11  |
| RPS26    | 1.3888 | 2.6187 | 1.6866E-20 | 9.3529E-16  |
| INSR     | 1.3954 | 2.6306 | 1.0849E-23 | 6.0162E-19  |
| CCDC152  | 1.4066 | 2.6511 | 1.1338E-18 | 6.2872E-14  |
| FDFT1    | 1.4072 | 2.6522 | 3.3421E-11 | 1.8533E-06  |
| SLC40A1  | 1.4129 | 2.6628 | 2.7745E-21 | 1.5386E-16  |
| PLEKHA5  | 1.414  | 2.6648 | 3.7362E-20 | 2.0719E-15  |
| MALAT1   | 1.4236 | 2.6825 | 2.3692E-15 | 1.3138E-10  |
| PDCD4    | 1.4399 | 2.713  | 2.5974E-11 | 1.4404E-06  |
| RAB3D    | 1.4561 | 2.7436 | 9.3592E-19 | 5.19E-14    |
| UGDH     | 1.4645 | 2.7596 | 2.4399E-10 | 0.00001353  |
| SLC35F2  | 1.4674 | 2.7653 | 8.7092E-14 | 4.8296E-09  |
| PTPRS    | 1.4919 | 2.8126 | 1.9595E-23 | 1.0866E-18  |
| PTBLP    | 1.4921 | 2.813  | 8.1219E-12 | 4.5039E-07  |
| SCGB2A2  | 1.5028 | 2.8339 | 3.4227E-07 | 0.019       |
| RNF135   | 1.5169 | 2.8617 | 1.1847E-23 | 6.5695E-19  |
| PDCD4    | 1.5197 | 2.8672 | 1.7501E-09 | 0.000097049 |
| MDK      | 1.5204 | 2.8687 | 1.439E-14  | 7.9796E-10  |
| C1orf56  | 1.536  | 2.8999 | 1.3251E-19 | 7.3485E-15  |
| ANKRD30A | 1.5469 | 2.9218 | 1.2815E-24 | 7.1065E-20  |
| ACADSB   | 1.5722 | 2.9735 | 1.0411E-13 | 5.7735E-09  |
| BST2     | 1.5804 | 2.9906 | 2.4609E-16 | 1.3647E-11  |
| CWC25    | 1.5852 | 3.0005 | 1.9733E-21 | 1.0943E-16  |
| ELOVL5   | 1.6089 | 3.0502 | 6.2477E-16 | 3.4646E-11  |
| NUDT19   | 1.6202 | 3.0742 | 8.634E-16  | 4.7879E-11  |
| IDH1     | 1.6298 | 3.0946 | 2.2709E-12 | 1.2593E-07  |
| PON2     | 1.6567 | 3.1529 | 1.4095E-09 | 0.000078165 |
| CTNNB1   | 1.7231 | 3.3016 | 5.6174E-22 | 3.1151E-17  |
| SCOC     | 1.7733 | 3.4183 | 5.2469E-11 | 2.9096E-06  |
| MIEN1    | 1.783  | 3.4413 | 7.6905E-22 | 4.2647E-17  |

|              |        |         |            |             |
|--------------|--------|---------|------------|-------------|
| SEPP1        | 1.7968 | 3.4746  | 1.6255E-16 | 9.014E-12   |
| OAT          | 1.8006 | 3.4836  | 1.3564E-16 | 7.5219E-12  |
| SET          | 1.8147 | 3.5178  | 3.1175E-20 | 1.7288E-15  |
| TMEM45A      | 1.8457 | 3.5943  | 2.4585E-15 | 1.3633E-10  |
| MGST1        | 1.8464 | 3.596   | 1.3646E-15 | 7.5675E-11  |
| THRSP        | 1.8885 | 3.7025  | 9.4715E-24 | 5.2523E-19  |
| RELL1        | 1.9105 | 3.7593  | 1.5991E-14 | 8.8677E-10  |
| CDO1         | 1.9614 | 3.8944  | 5.9445E-24 | 3.2964E-19  |
| PER2         | 1.9858 | 3.9608  | 8.9663E-23 | 4.9722E-18  |
| SLC30A8      | 2.0057 | 4.0159  | 8.7755E-10 | 0.000048664 |
| TMEM45A      | 2.0062 | 4.0173  | 1.536E-16  | 8.5178E-12  |
| S100A7       | 2.0305 | 4.0856  | 2.0104E-08 | 0.0011      |
| LIMCH1       | 2.0513 | 4.1447  | 1.1065E-09 | 0.000061357 |
| NF1          | 2.0806 | 4.2297  | 4.4698E-25 | 2.4787E-20  |
| SOX11        | 2.0839 | 4.2395  | 2.7933E-22 | 1.549E-17   |
| SCGB2A1      | 2.1395 | 4.4062  | 7.152E-13  | 3.9661E-08  |
| TOP2A        | 2.1529 | 4.4473  | 1.3396E-22 | 7.4285E-18  |
| TNFSF10      | 2.1879 | 4.5566  | 7.5096E-18 | 4.1644E-13  |
| SNCG         | 2.1964 | 4.5834  | 4.2939E-23 | 2.3811E-18  |
| CISD3        | 2.2065 | 4.6155  | 2.782E-25  | 1.5427E-20  |
| EZR          | 2.2374 | 4.7155  | 6.4272E-20 | 3.5641E-15  |
| RBP1         | 2.2467 | 4.7458  | 1.4206E-20 | 7.8779E-16  |
| DKFZp451J181 | 2.2769 | 4.8462  | 1.2406E-16 | 6.8798E-12  |
| PLEKHA5      | 2.2869 | 4.8801  | 2.1867E-25 | 1.2126E-20  |
| AK026736     | 2.3744 | 5.1853  | 4.109E-24  | 2.2786E-19  |
| MRPL45       | 2.3896 | 5.2401  | 2.742E-22  | 1.5205E-17  |
| CLU          | 2.4335 | 5.4022  | 1.2048E-20 | 6.6812E-16  |
| PPP1R14C     | 2.4491 | 5.4609  | 4.7251E-22 | 2.6203E-17  |
| VSNL1        | 2.5272 | 5.7647  | 2.3175E-15 | 1.2851E-10  |
| YWHAE        | 2.6475 | 6.2657  | 4.346E-20  | 2.41E-15    |
| PSMB3        | 2.7851 | 6.8927  | 1.2327E-22 | 6.8356E-18  |
| CLEC3A       | 2.8833 | 7.3782  | 1.1418E-12 | 6.3316E-08  |
| CPB1         | 3.4418 | 10.866  | 2.2348E-10 | 0.000012393 |
| SULT1E1      | 3.5841 | 11.9929 | 5.8837E-22 | 3.2627E-17  |
| RPL23        | 3.8111 | 14.036  | 1.2081E-24 | 6.6992E-20  |
| SEPP1        | 3.8631 | 14.5514 | 6.7132E-25 | 3.7227E-20  |
| SCGB2A2      | 4.5616 | 23.6138 | 3.1213E-14 | 1.7309E-09  |
| PIP          | 4.7832 | 27.5358 | 9.3925E-27 | 5.2085E-22  |
| DCD          | 6.3026 | 78.9347 | 6.6683E-24 | 3.6979E-19  |
| MGP          | 6.4026 | 84.5995 | 2.3895E-24 | 1.3251E-19  |

**Table S2. IPA identified 48-gene signature related with cell death of cardiomyocytes.**

| Categories                                                                         | Diseases or Functions Annotation   | p-Value  | Predicted Activation State | Activation z-score |
|------------------------------------------------------------------------------------|------------------------------------|----------|----------------------------|--------------------|
| Cell Death and Survival                                                            | Cell death                         | 6.11E-47 | Increased                  | 2.002              |
| Cell Death and Survival                                                            | Apoptosis                          | 4.03E-39 | Increased                  | 2.608              |
| Organismal Survival                                                                | Morbidity or mortality             | 5.09E-22 | Increased                  | 4.321              |
| Organismal Survival                                                                | Organismal death                   | 6.43E-22 | Increased                  | 4.685              |
| Infectious Diseases                                                                | Replication of virus               | 1.23E-19 | Increased                  | 2.481              |
| Infectious Diseases                                                                | Replication of RNA virus           | 1.19E-17 | Increased                  | 2.063              |
| Cardiovascular Disease, Hematological Disease, Organismal Injury and Abnormalities | Anemia                             | 1.44E-15 | Increased                  | 2.047              |
| Infectious Diseases                                                                | Bacterial Infections               | 1.98E-12 | Increased                  | 2.812              |
| Metabolic Disease                                                                  | Amyloidosis                        | 1.45E-10 | Increased                  | 2.158              |
| Cell Death and Survival, Organismal Injury and Abnormalities                       | Apoptosis of epithelial cells      | 7.11E-09 | Increased                  | 2.006              |
| Cell Death and Survival                                                            | Cell survival                      | 2.54E-31 | Decreased                  | -3.324             |
| Cellular Movement                                                                  | Cell movement                      | 8.54E-30 | Decreased                  | -3.887             |
| Cellular Movement                                                                  | Invasion of cells                  | 4.5E-29  | Decreased                  | -2.25              |
| Cell Death and Survival                                                            | Cell viability                     | 1.34E-27 | Decreased                  | -3.46              |
| Cellular Movement                                                                  | Cell movement of tumor cell lines  | 2.83E-27 | Decreased                  | -2.483             |
| Cellular Movement                                                                  | Migration of cells                 | 4.85E-27 | Decreased                  | -3.456             |
| Cellular Movement                                                                  | Invasion of tumor cell lines       | 6.86E-26 | Decreased                  | -2.209             |
| Protein Synthesis                                                                  | Metabolism of protein              | 3.78E-25 | Decreased                  | -2.286             |
| Immunological Disease                                                              | Hypersensitive reaction            | 6.42E-25 | Decreased                  | -2.61              |
| Cellular Movement                                                                  | Migration of tumor cell lines      | 1.99E-23 | Decreased                  | -2.294             |
| Cell Death and Survival                                                            | Cell viability of tumor cell lines | 4.91E-22 | Decreased                  | -2.225             |
| Cellular Movement                                                                  | Cell movement of blood cells       | 1.15E-19 | Decreased                  | -4.009             |
| Cellular Movement, Immune Cell Trafficking                                         | Leukocyte migration                | 3.39E-19 | Decreased                  | -4.021             |
| Hematological System Development and Function, Tissue Morphology                   | Quantity of leukocytes             | 8.73E-19 | Decreased                  | -3.208             |

|                                                                                                                  |                                      |          |           |        |
|------------------------------------------------------------------------------------------------------------------|--------------------------------------|----------|-----------|--------|
| Hematological System Development and Function, Tissue Morphology                                                 | Quantity of blood cells              | 1.87E-18 | Decreased | -3.068 |
| Cellular Movement, Hematological System Development and Function, Immune Cell Trafficking                        | Cell movement of leukocytes          | 3.68E-18 | Decreased | -3.694 |
| Cellular Movement, Hematological System Development and Function, Immune Cell Trafficking, Inflammatory Response | Cell movement of phagocytes          | 4.13E-18 | Decreased | -3.331 |
| Protein Synthesis                                                                                                | Synthesis of protein                 | 4.79E-18 | Decreased | -2.064 |
| Cellular Movement                                                                                                | Cell movement of myeloid cells       | 3.04E-17 | Decreased | -3.69  |
| Lymphoid Tissue Structure and Development, Tissue Morphology                                                     | Quantity of lymphatic system cells   | 1.08E-16 | Decreased | -3.786 |
| Infectious Diseases                                                                                              | Infection by Retroviridae            | 2.59E-16 | Decreased | -2.355 |
| Infectious Diseases                                                                                              | Infection by lentivirus              | 3.1E-16  | Decreased | -2.285 |
| Free Radical Scavenging                                                                                          | Synthesis of reactive oxygen species | 5.61E-16 | Decreased | -2.879 |

**Table S3. IPA predicted top disease and functions related with differential expressed genes.**

| GeneID   | Prediction (based on measurement direction) | Fold Change |
|----------|---------------------------------------------|-------------|
| PPP1R15A | Affected                                    | -1.555      |
| CAMK2D   | Affected                                    | 1.547       |
| MAP2K3   | Affected                                    | -2.147      |
| KRAS     | Affected                                    | -1.357      |
| RHOA     | Affected                                    | -1.643      |
| BNIP3L   | Increased                                   | -1.351      |
| IL1RN    | Increased                                   | 1.696       |
| TXNIP    | Increased                                   | -1.687      |
| CTNNB1   | Increased                                   | 2.756       |
| CALR     | Increased                                   | 1.538       |
| FOXO3    | Increased                                   | 1.31        |
| STK4     | Increased                                   | -1.823      |
| ACSL1    | Increased                                   | -1.522      |
| STAT1    | Increased                                   | -1.868      |
| TNF      | Increased                                   | -1.535      |
| HK2      | Increased                                   | 1.343       |
| MDK      | Increased                                   | 2.575       |
| BAG1     | Increased                                   | 1.375       |
| PPP3CA   | Increased                                   | -2.055      |
| HIF1A    | Increased                                   | -1.7        |
| GAPDH    | Increased                                   | -2.355      |
| MDM2     | Increased                                   | 1.63        |
| PTEN     | Increased                                   | 1.379       |
| PHB      | Increased                                   | -1.382      |
| GNAQ     | Increased                                   | 1.373       |
| PLRG1    | Increased                                   | -1.581      |
| CAT      | Increased                                   | -1.483      |
| EDN1     | Increased                                   | -1.366      |
| SPP1     | Increased                                   | 2.269       |
| IL1B     | Increased                                   | -1.321      |
| CRYAB    | Increased                                   | -2.606      |
| MANF     | Increased                                   | -1.544      |
| HSPB1    | Increased                                   | -1.675      |
| SOD2     | Increased                                   | -4.232      |
| NCL      | Increased                                   | -1.545      |
| CASP3    | Increased                                   | -1.401      |
| MCL1     | Increased                                   | -1.64       |
| DSP      | Increased                                   | -1.298      |
| HSPD1    | Increased                                   | -1.528      |
| HSPE1    | Increased                                   | -1.973      |
| PTN      | Increased                                   | 1.471       |

|         |           |        |
|---------|-----------|--------|
| CXADR   | Increased | -1.585 |
| HDAC2   | Increased | -1.521 |
| HMOX1   | Increased | -1.415 |
| IL6ST   | Increased | -1.32  |
| TNFAIP3 | Increased | -1.442 |
| NAMPT   | Increased | -1.992 |
| TIMP1   | Increased | -1.437 |
